# Supplementary material
Source: PubMed Central journal article supplement (PMC7960122)
Supplement: 15-00757.pdf [file 15-00757.pdf]

**On-line Table: Antenatal US and iuMR information in 26 cases in which fetal holoprosencephaly was diagnosed on iuMR<sup>a</sup>**

| Case            | Gestational Age at iuMR (wks) | Antenatal US Diagnosis           | iuMR Diagnosis (DeMyer) | iuMR Severity    |                                                               |
|-----------------|-------------------------------|----------------------------------|-------------------------|------------------|---------------------------------------------------------------|
|                 |                               |                                  |                         | Score (max = 20) | Other Findings on iuMR                                        |
| 1               | 21                            | Semilobar HPE                    | Semilobar HPE           | 13               | Cerebellar hypoplasia, midline CL/CP                          |
| 2               | 24                            | Alobar HPE                       | Alobar HPE              | 20               | Kinked brain stem, cebocephaly                                |
| 3               | 19                            | Semilobar HPE                    | Lobar HPE               | 6                | Rhombencephalosynapsis                                        |
| 4               | 21                            | HPE (not specified)              | Semilobar HPE           | 13               | Cerebellar hypoplasia, kinked brain stem                      |
| 5               | 21                            | Posterior encephalocele          | Semilobar HPE           | 13               | Meningocele, DWM                                              |
| 6               | 21                            | HPE (not specified)              | Lobar HPE               | 6                | DWM, hemispheric dysgenesis                                   |
| 7               | 30                            | HPE (not specified)              | Lobar HPE               | 9                | None                                                          |
| 8               | 26                            | Alobar HPE                       | Alobar HPE              | 20               | None                                                          |
| 9 <sup>b</sup>  | 18                            | HPE (not specified)              | Alobar HPE              | 20               | None                                                          |
| 10              | 19                            | Absent CSP and agenesis CC       | Semilobar HPE           | 12               | Midline CL/CP                                                 |
| 11              | 20                            | Midline CL/CP                    | Semilobar HPE           | 10               | Midline CL/CP                                                 |
| 12              | 23                            | HPE (not specified)              | Semilobar HPE           | 14               | Rhombencephalic synapsis                                      |
| 13              | 19                            | HPE (not specified)              | Alobar HPE              | 19               | None                                                          |
| 14 <sup>c</sup> | 21                            | Semilobar HPE                    | Alobar HPE              | 19               | None                                                          |
| 15              | 21                            | Absent CSP, midline CL/CP        | Lobar HPE               | 7                | Arhinia, midline CL/CP                                        |
| 16              | 20                            | HPE (not specified)              | Lobar HPE               | 9                | None                                                          |
| 17 <sup>d</sup> | 29                            | Ventriculomegaly                 | Semilobar HPE           | 10               | Coloboma, falcine sinus, abnormal superior sagittal sinus     |
| 18              | 20                            | Posterior interhemispheric cyst  | Lobar HPE               | 5                | None                                                          |
| 19              | 26                            | Microcephaly, hypoplasia CC      | Semilobar HPE           | 13               | None                                                          |
| 20              | 21                            | Ventriculomegaly and agenesis CC | Lobar HPE               | 9                | Marked hypoplasia and abnormal sulcation of the frontal lobes |
| 21              | 22                            | Hypoplastic cerebellum           | MIHF                    | 2                | None                                                          |
| 22              | 21                            | HPE (not specified)              | Semilobar HPE           | 11               | DWM                                                           |
| 23              | 21                            | Lobar HPE                        | MIHF                    | 2                | None                                                          |
| 24 <sup>e</sup> | 23                            | Agenesis CC                      | Lobar HPE               | 3                | None                                                          |
| 25              | 19                            | Ventriculomegaly                 | MIHF                    | 2                | None                                                          |
| 26              | 25                            | Posterior interhemispheric cyst  | Semilobar HPE           | 15               | Falcine sinus                                                 |

**Note:**—CL/CP indicates cleft lip and cleft palate; DWM, Dandy-Walker malformation; CC, corpus callosum; max, maximum; CSP, cavum septum pellucidum.

<sup>a</sup> The DeMyer classification of holoprosencephaly and severity score based on detailed anatomic assessment on iuMR is shown in columns 4 and 5 and is correlated in Fig 2.

<sup>b</sup> Trisomy 18.

<sup>c</sup> Dichorionic/diamniotic twin pregnancy, healthy co-twin.

<sup>d</sup> Meckel-Gruber syndrome.

<sup>e</sup> Associated with vertebral defects, anal atresia, cardiac defects, tracheo-esophageal fistula, renal anomalies, and limb abnormalities.
